# Supplementary material for: NOF1 Encodes an Arabidopsis Protein Involved in the Control of rRNA Expression
Source: PubMed Central journal article supplement (PMC2942902; doi:10.1371/journal.pone.0012829), 2010-09-20

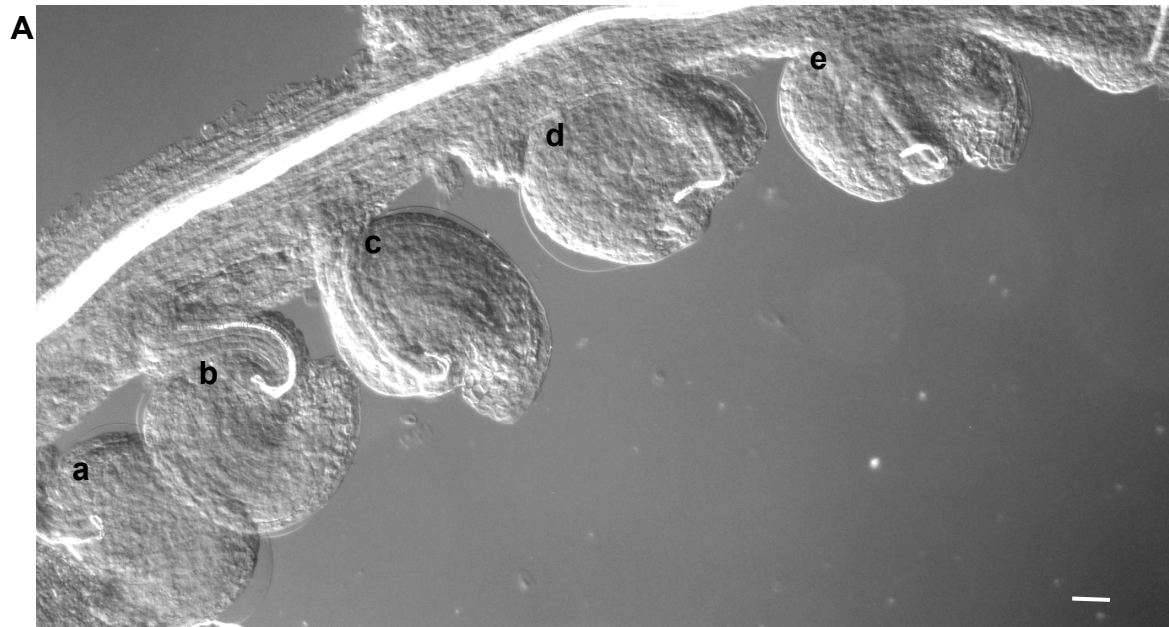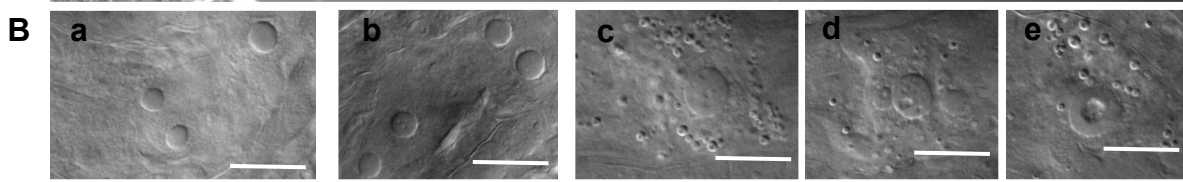

Supplement: pone.0012829.s002.pdf [file pone.0012829.s002.pdf]
