# Supplementary material for: NOF1 Encodes an Arabidopsis Protein Involved in the Control of rRNA Expression
Source: PubMed Central journal article supplement (PMC2942902; doi:10.1371/journal.pone.0012829), 2010-09-20
Supplement: pone.0012829.s004.pdf [file pone.0012829.s004.pdf]

|                      | Up/RB                                                                               | 2821/LB3                                                                            | K <sup>r</sup> % | H <sup>r</sup> % |
|----------------------|-------------------------------------------------------------------------------------|-------------------------------------------------------------------------------------|------------------|------------------|
| <i>nof1-1/NOF1-1</i> |    |    | 64               | 0                |
| <i>nof1-2/NOF1-2</i> |    |   | 29               | 0                |
| Ws                   |  |  | 0                | 0                |
| 6A2                  |  |  | 100              | 100              |
| 10B1                 |  |  | 100              | 100              |
| 17B3                 |  |  | 100              | 100              |
