# Supplementary material for: NOF1 Encodes an Arabidopsis Protein Involved in the Control of rRNA Expression
Source: PubMed Central journal article supplement (PMC2942902; doi:10.1371/journal.pone.0012829), 2010-09-20
Supplement: pone.0012829.s005.pdf [file pone.0012829.s005.pdf]

At1g17690 259406\_at

Arabidopsis eFP Browser at bar.utoronto.ca  
 Winter et al., 2007. PLoS One 2(8): e718

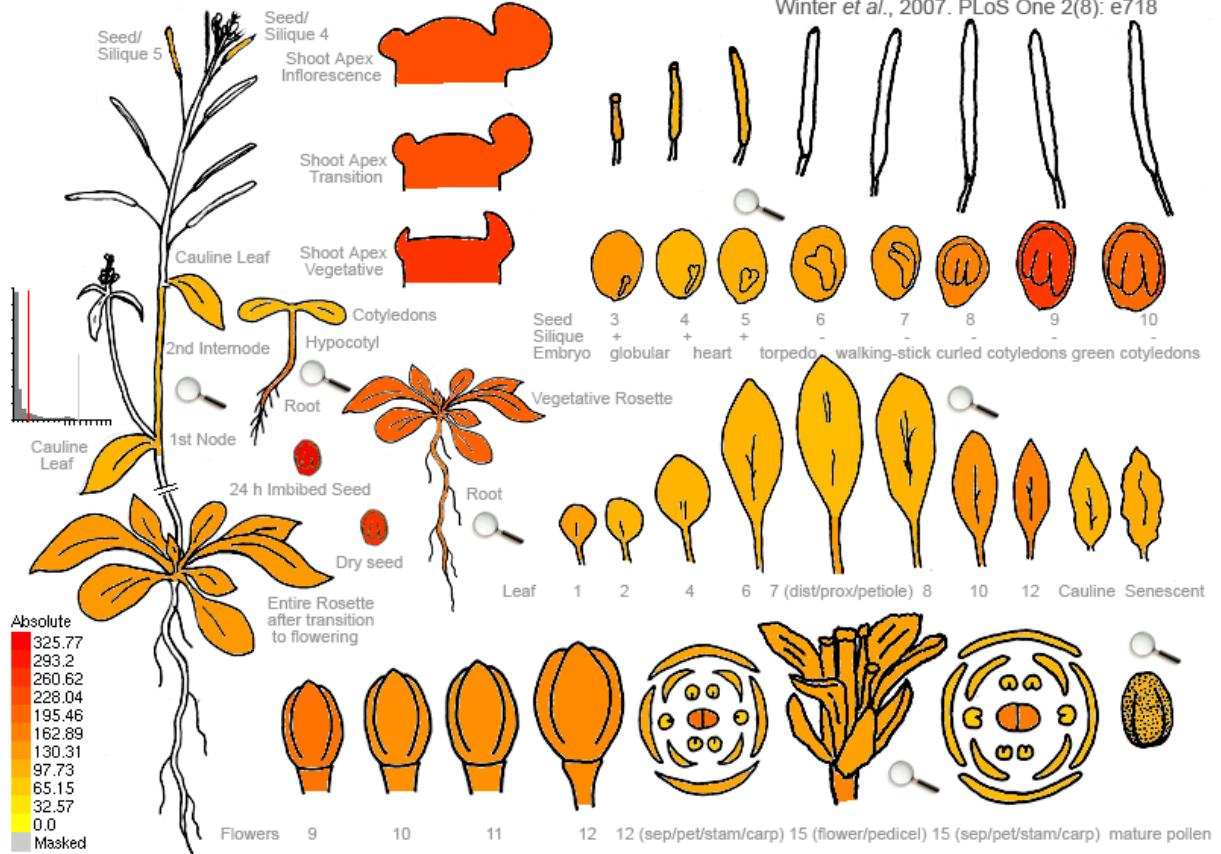

eFP Browser by B. Vinegar, drawn by J. Alls and N. Provar. Data from Gene Expression Map of Arabidopsis Development: Schmid et al., 2005, Nat. Gen. 37:501, and the Nambara lab for the imbibed and dry seed stages. Data are normalized by the GCOS method, TGT value of 100. Most tissues were sampled in triplicate.
