# Supplementary material for: NOF1 Encodes an Arabidopsis Protein Involved in the Control of rRNA Expression
Source: PubMed Central journal article supplement (PMC2942902; doi:10.1371/journal.pone.0012829), 2010-09-20

## Nodes (proteins)

Colour = Subcellular localization

- Chloroplast
- Vacuole
- Golgi
- Plasma membrane
- ER
- Nucleus
- Cytoplasm
- Unknown
- Mitochondria
- Peroxisome

Central/input nodes are larger

## Edges (interactions)

Thickness = CV    Colour = co-expression

- |                                                                                             |     |                                                                                              |                 |
|---------------------------------------------------------------------------------------------|-----|----------------------------------------------------------------------------------------------|-----------------|
| <span style="border-bottom: 2px solid black; width: 20px; display: inline-block;"></span>   | >10 | <span style="border-bottom: 2px solid red; width: 20px; display: inline-block;"></span>      | >0.8            |
| <span style="border-bottom: 1.5px solid black; width: 20px; display: inline-block;"></span> | >5  | <span style="border-bottom: 1.5px solid orange; width: 20px; display: inline-block;"></span> | >0.7            |
| <span style="border-bottom: 1px solid black; width: 20px; display: inline-block;"></span>   | >2  | <span style="border-bottom: 1px solid yellow; width: 20px; display: inline-block;"></span>   | >0.6            |
| <span style="border-bottom: 1px dashed black; width: 20px; display: inline-block;"></span>  | <2  | <span style="border-bottom: 1px solid grey; width: 20px; display: inline-block;"></span>     | <0.5 or unknown |
|                                                                                             |     | <span style="border-bottom: 1px solid blue; width: 20px; display: inline-block;"></span>     | BIND exp.       |

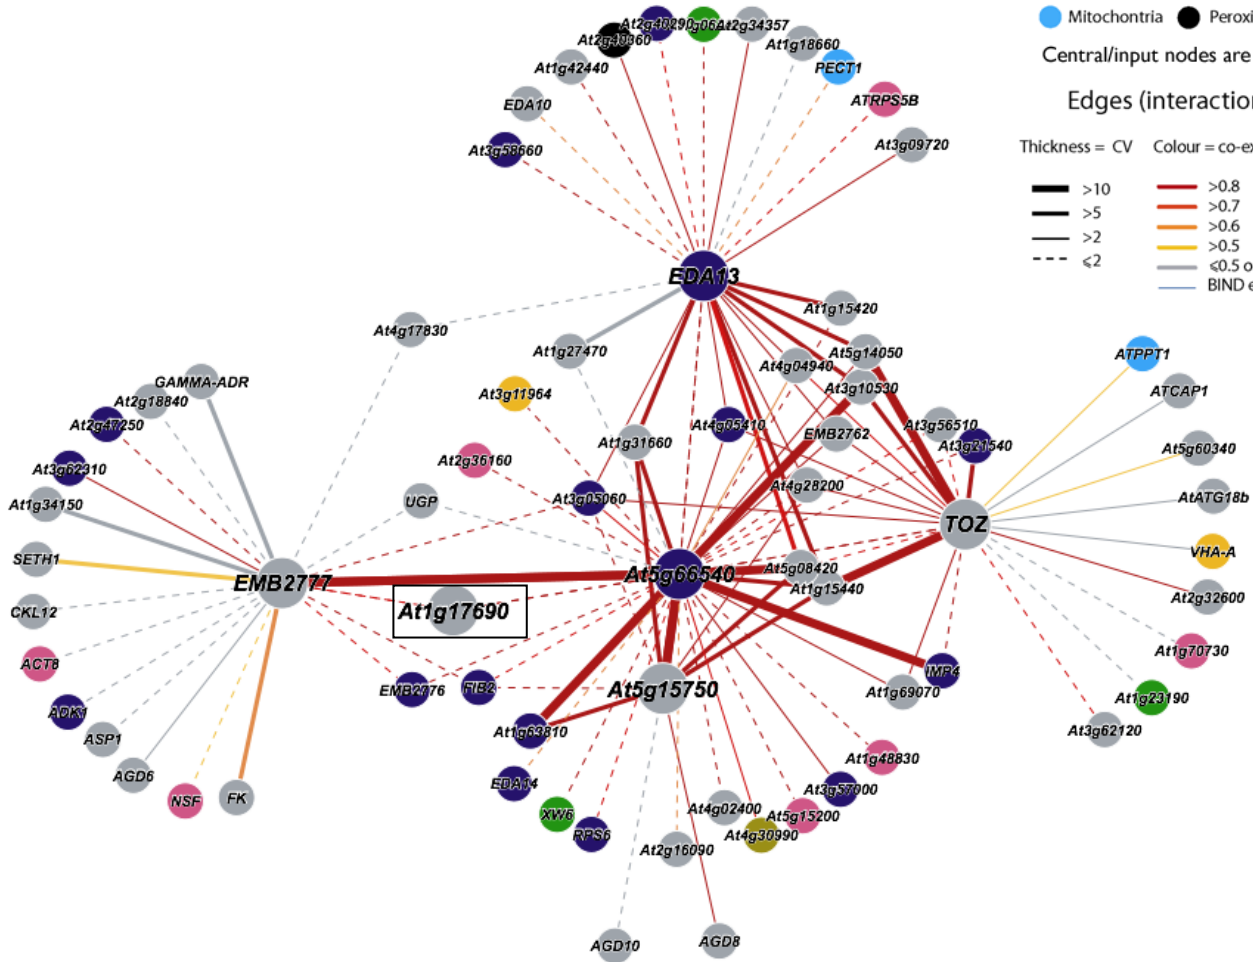

Supplement: pone.0012829.s007.pdf [file pone.0012829.s007.pdf]
