# Supplementary material for: NOF1 Encodes an Arabidopsis Protein Involved in the Control of rRNA Expression
Source: PubMed Central journal article supplement (PMC2942902; doi:10.1371/journal.pone.0012829), 2010-09-20
Supplement: pone.0012829.s008.pdf [file pone.0012829.s008.pdf]

**A**

| <i>nof1-1/NOF1-1</i><br>self pollination | Kr   | Ks  | Total number of<br>plants |
|------------------------------------------|------|-----|---------------------------|
| Number of plants                         | 1502 | 859 | 2361                      |
| Theoretical values                       | 2/3  | 1/3 |                           |
| Theoretical<br>number                    | 1574 | 787 | $\chi^2 = 9,88$           |

**B**

| <i>nof1-2/NOF1-2</i><br>self pollination | Kr    | Ks    | Total number of<br>plants |
|------------------------------------------|-------|-------|---------------------------|
| Number of plants                         | 268   | 647   | 915                       |
| Theoretical values                       | 1/2   | 1/2   |                           |
| Theoretical<br>number                    | 457,5 | 457,5 | $\chi^2 = 142,8$          |
