# Supplementary material for: NOF1 Encodes an Arabidopsis Protein Involved in the Control of rRNA Expression
Source: PubMed Central journal article supplement (PMC2942902; doi:10.1371/journal.pone.0012829), 2010-09-20
Supplement: pone.0012829.s009.pdf [file pone.0012829.s009.pdf]

**A**

| ♀ <i>nof1-1/NOF1-1</i><br>♂ WT | [emb] seeds | [WT] seeds | total seeds number |
|--------------------------------|-------------|------------|--------------------|
| observed                       | 4           | 102        | 106                |
| expected ratio                 | 0%          | 100%       |                    |
| expected                       | 0           | 106        |                    |

**E**

| ♀ <i>nof1-1/NOF1-1</i><br>♂ WT | [Kr] plantlets | [Ks] plantlets | Total plant number |
|--------------------------------|----------------|----------------|--------------------|
| observed                       | 39             | 52             | 91                 |
| expected ratio                 | 1/2            | 1/2            |                    |
| expected                       | 45,5           | 45,5           |                    |

$\chi^2 = 1,86$

**B**

| ♀ WT<br>♂ <i>nof1-1/NOF1-1</i> | [emb] seeds | [WT] seeds | Nb de graines totales |
|--------------------------------|-------------|------------|-----------------------|
| observed                       | 4           | 239        | 243                   |
| expected ratio                 | 0%          | 100%       |                       |
| expected                       | 0           | 243        |                       |

**F**

| ♀ WT<br>♂ <i>nof1-1/NOF1-1</i> | [Kr] plantlets | [Ks] plantlets | Total plant number |
|--------------------------------|----------------|----------------|--------------------|
| observed                       | 121            | 106            | 227                |
| expected ratio                 | 1/2            | 1/2            |                    |
| expected                       | 113,5          | 113,5          |                    |

$\chi^2 = 0,99$

**C**

| ♀ <i>nof1-2/NOF1-2</i><br>♂ WT | [emb] seeds | [WT] seeds | Nb de graines totales |
|--------------------------------|-------------|------------|-----------------------|
| observed                       | 7           | 178        | 185                   |
| expected ratio                 | 0%          | 100%       |                       |
| expected                       | 0           | 185        |                       |

**G**

| ♀ <i>nof1-2/NOF1-2</i><br>♂ WT | [Kr] plantlets | [Ks] plantlets | Total plant number |
|--------------------------------|----------------|----------------|--------------------|
| observed                       | 0              | 89             | 89                 |
| expected ratio                 | 1/2            | 1/2            |                    |
| expected                       | 44,5           | 44,5           |                    |

$\chi^2 = 89$

**D**

| ♀ WT<br>♂ <i>nof1-2/NOF1-2</i> | [emb] seeds | [WT] seeds | Nb de graines totales |
|--------------------------------|-------------|------------|-----------------------|
| observed                       | 9           | 465        | 474                   |
| expected ratio                 | 0%          | 100%       |                       |
| expected                       | 0           | 474        |                       |

**H**

| ♀ WT<br>♂ <i>nof1-2/NOF1-2</i> | [Kr] plantlets | [Ks] plantlets | Total plant number |
|--------------------------------|----------------|----------------|--------------------|
| observed                       | 163            | 257            | 420                |
| expected ratio                 | 1/2            | 1/2            |                    |
| expected                       | 210            | 210            |                    |

$\chi^2 = 21,04$
