# Supplementary material for: NOF1 Encodes an Arabidopsis Protein Involved in the Control of rRNA Expression
Source: PubMed Central journal article supplement (PMC2942902; doi:10.1371/journal.pone.0012829), 2010-09-20
Supplement: pone.0012829.s010.pdf [file pone.0012829.s010.pdf]

|                 |                                                       |
|-----------------|-------------------------------------------------------|
| B1dke14ATGgate  | GGGGACAAGTTTGTACAAAAAAGCAGGCTGATGGCTCCAAACGCTACTG     |
| B1dke14STOPgate | GGGGACCACTTTGTACAAGAAAGCTGGGTACAGAAAGCAAACATGTTCT     |
| B1DKE14up       | GGGGACAAGTTTGTACAAAAAAGCAGGCTGGATCTTTTGTGTTGTTGATGCCA |
| B2DKE14low      | GGGGACCACTTTGTACAAGAAAGCTGGGTCTTAGGGAAGTAACTGGTG      |
| EF1aA4UP        | ATGCCCCAGGACATCGTGATTTTCAT                            |
| EF1aA4Low       | TTGGCGGCACCCTTAGCTGGATCA                              |
| U1              | CGTAACGAAGATGTTCTTGGC                                 |
| U2              | TGCGACCCTCCATAAGTC                                    |
| U3              | TGGAGCGATTTGTCTGGTTA                                  |
| U4              | CTGCAATTCACACCAAGTAT                                  |
| 18Sfor          | TGACGGAGAATTAGGGTTC                                   |
| 18Srev          | CCTCCAATGGATCCTCGTTA                                  |
| 5,8Sfor         | GCAACGGATATCTCGCTCTC                                  |
| 5,8Srev         | TGCGTTCAAAGACTCGATGG                                  |
| 25Sffor         | AACGGGCTTGGCAGAATCAG                                  |
| 25Srev          | ACGGACTTAGCCAACGACAC                                  |
| p2for           | GCATGCCAAAAAGAATTTTCAA                                |
| p2rev           | CTCGGAAAAAGGCAACAAAACC                                |
| Up              | AGATGAACCAAGAGACACCAGCAAA                             |
| dke_pg2821      | GCAATGATAAAAAGAAGTACCTCT                              |
| LB3             | GACAACTTTCCTTCTCATCT                                  |
| RB2             | CTGATACCAGACGTTGCCCG                                  |
